# Supplementary material for: Highly efficient deep-blue electroluminescence based on the triphenylamine-cored and peripheral blue emitters with segregative HOMO–LUMO characteristics
Source: Royal Society of Chemistry journal article supplement (doi:10.1039/c1jm14639d), 2011-11-21

**Supporting Information for *J. Mater. Chem.***

**Highly Efficient Deep-Blue Electroluminescence Based on the Triphenylamine-Cored and Peripheral Blue Emitters with Segregative HOMO-LUMO Characteristics**

*Shi Tang,<sup>a</sup> Weijun Li,<sup>a</sup> Fangzhong Shen,<sup>a</sup> Dandan Liu,<sup>a</sup> Bing Yang\*<sup>a,b</sup> and Yuguang Ma\*<sup>a</sup>*

<sup>a</sup> State Key Laboratory for Supramolecular Structure and Materials, Jilin University, Changchun, 130012, P. R. China

<sup>b</sup> Department of Chemistry, Jilin University, Changchun, 130012, P. R. China

E-mail: ygma@jlu.edu.cn; yangbing@jlu.edu.cn

Figure S1. The <sup>1</sup>H NMR spectra of TPA-AN.

Figure S2. The MALDI-TOF-MS spectra of TPA-AN.

Figure S3. The <sup>1</sup>H NMR spectra of TPA-PA.

Figure S4. The MALDI-TOF-MS spectra of TPA-PA.

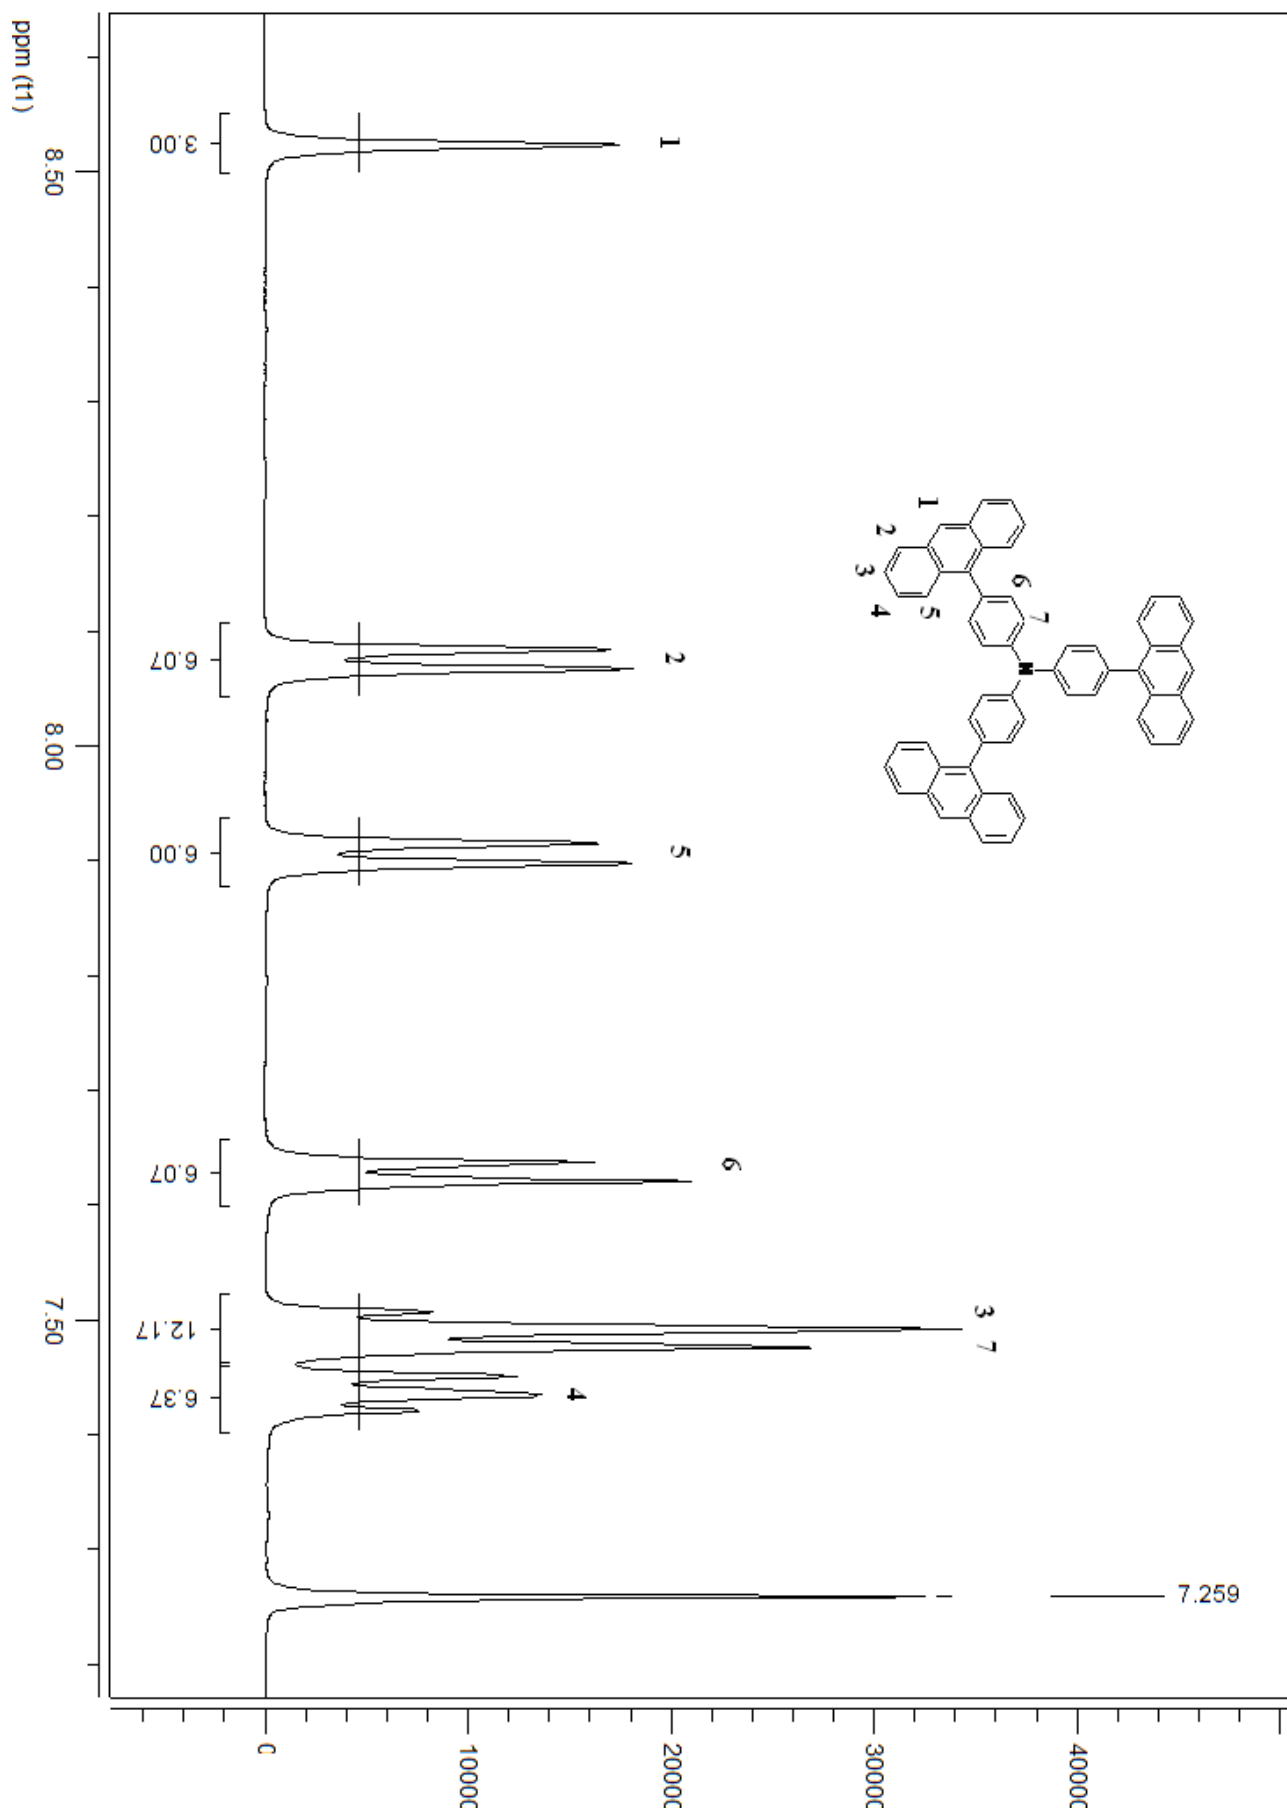

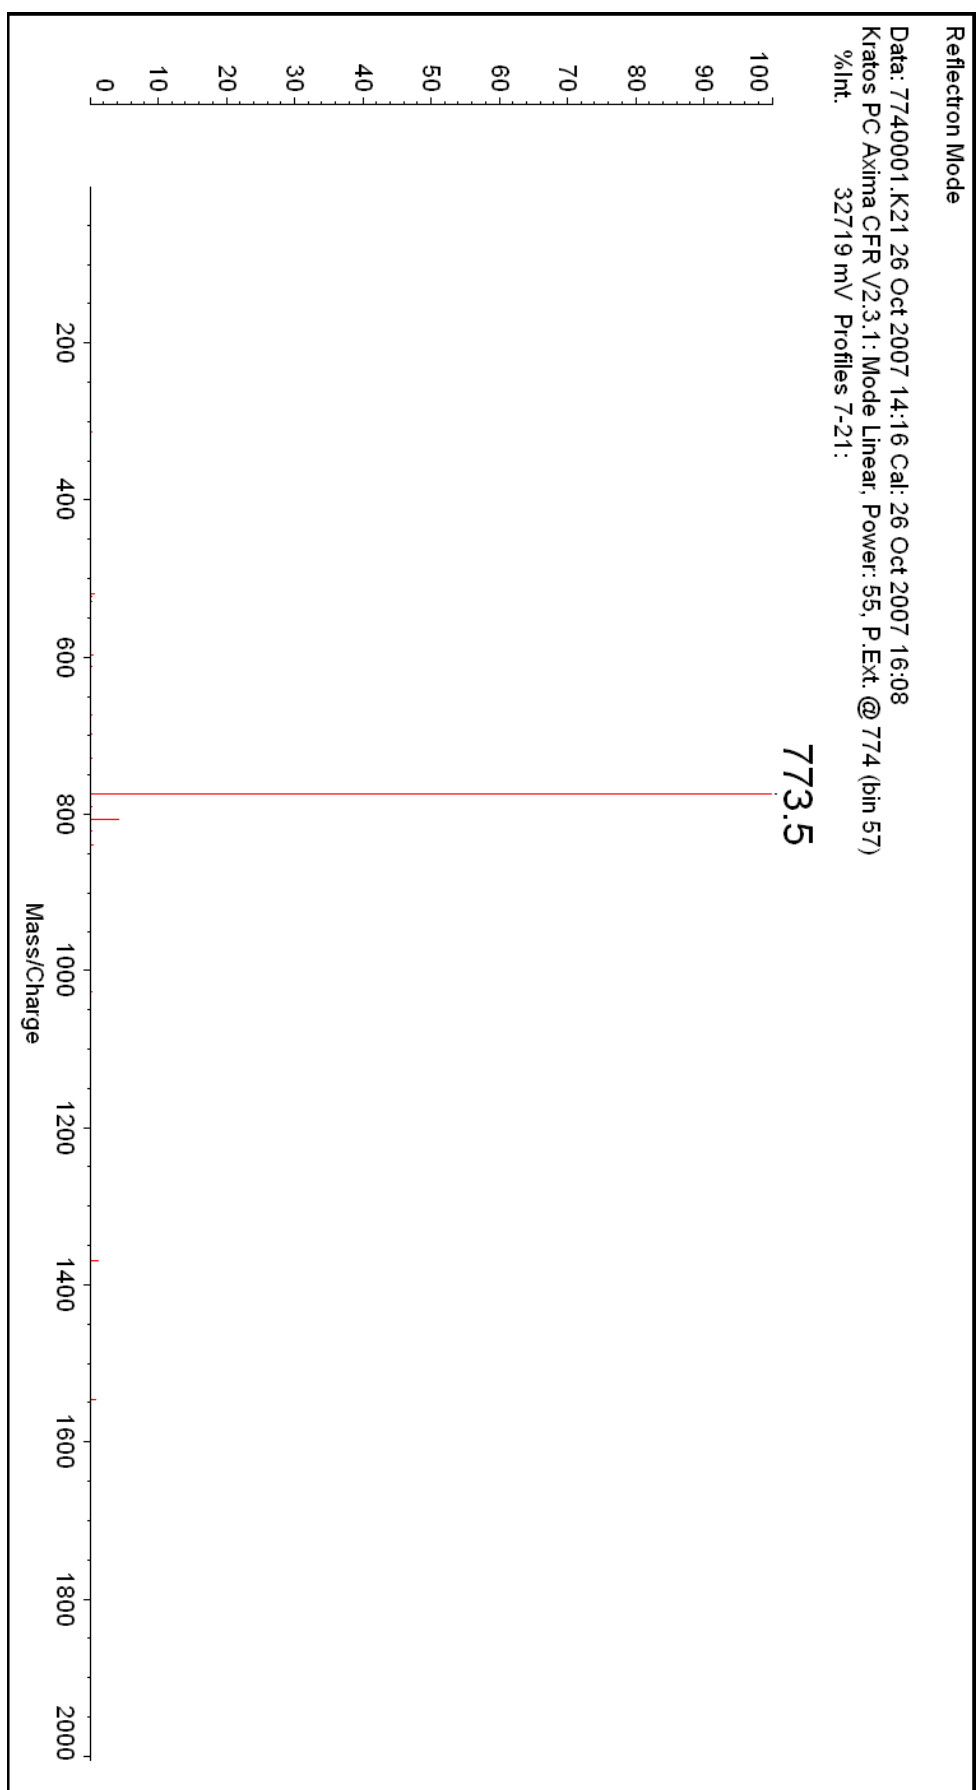

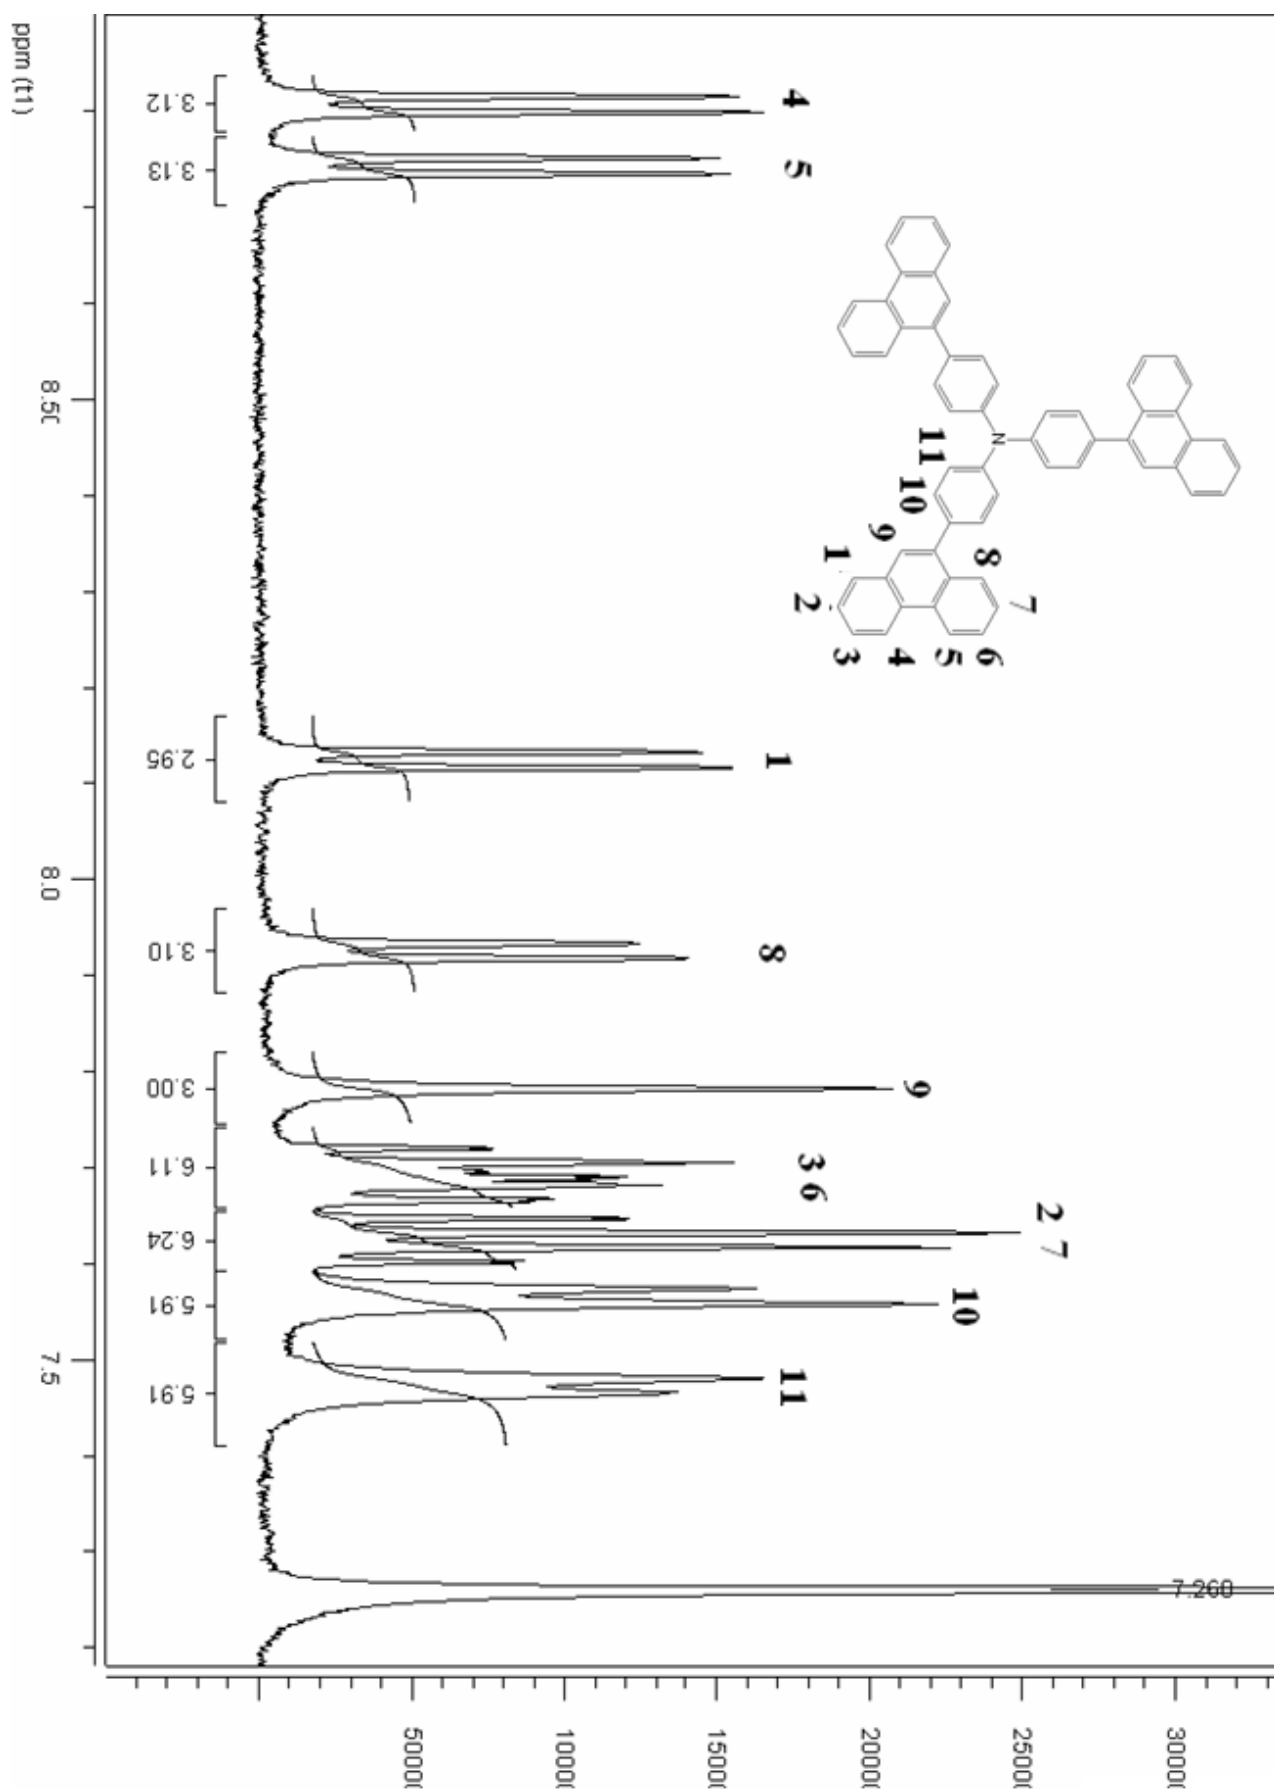

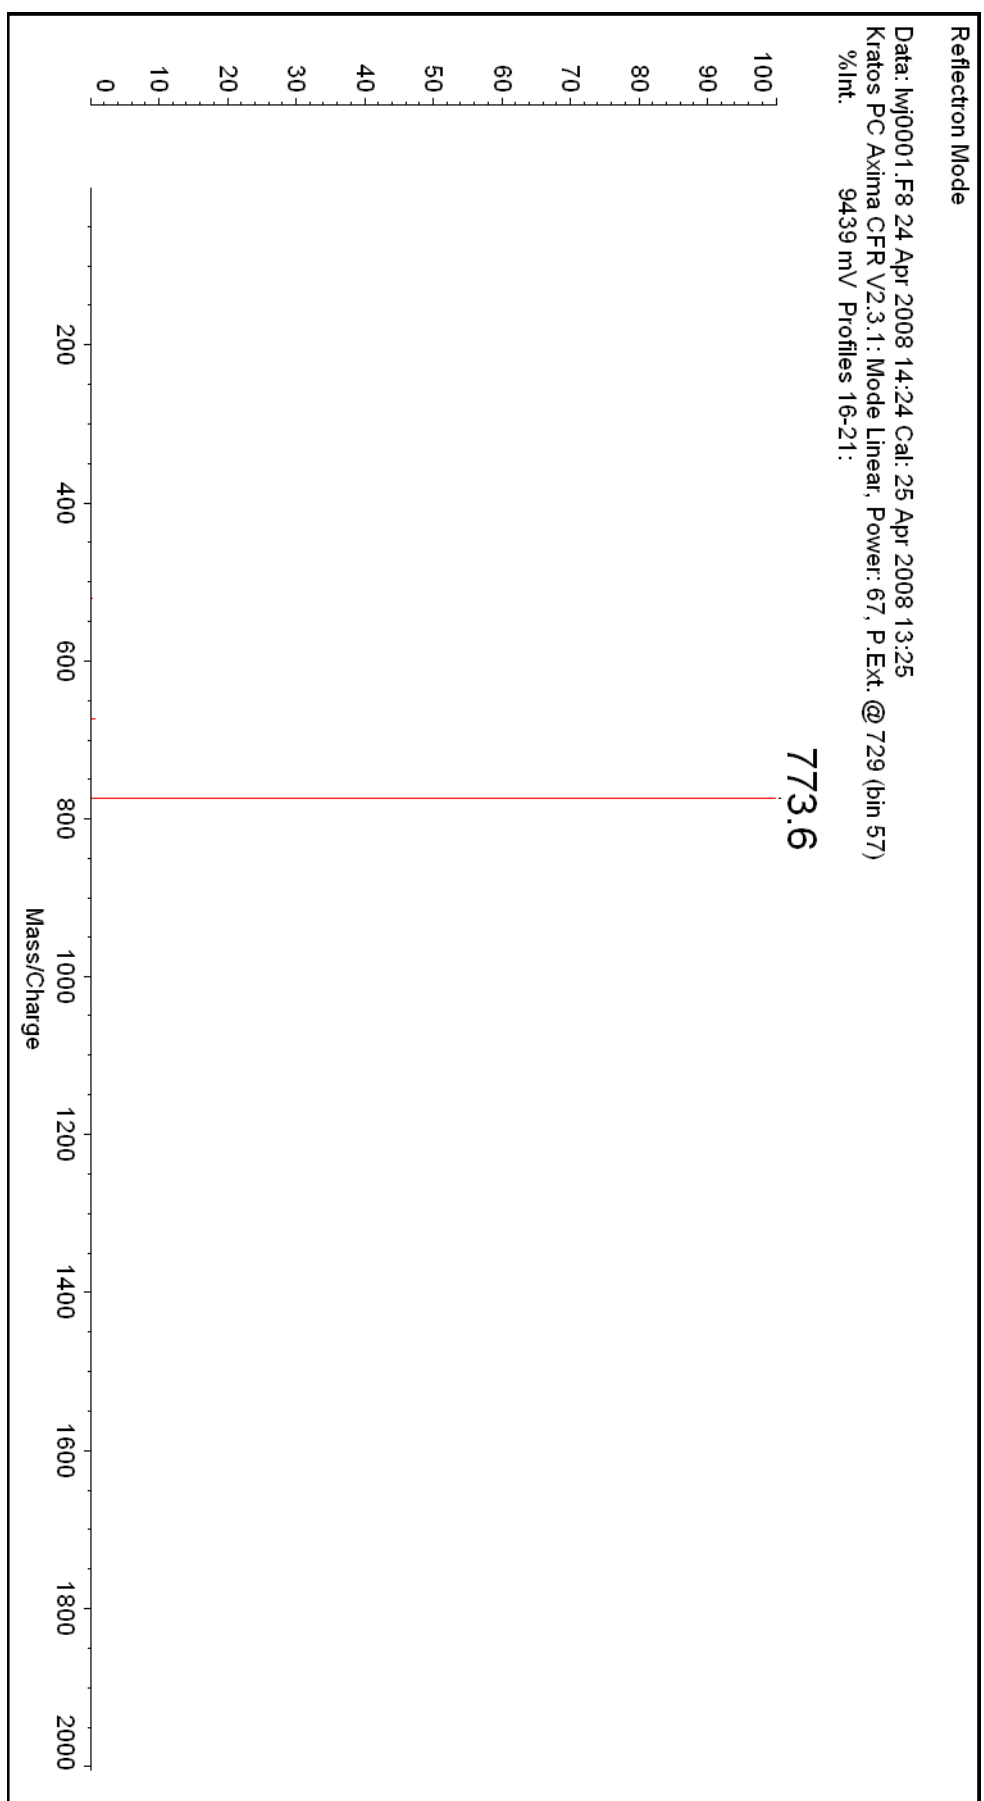

Supplement: c1jm14639d.pdf [file c1jm14639d.pdf]
